# Supplementary material for: From crude industrial waste glycerol to biopropene via Ru-mediated hydrodeoxygenation in ionic liquids
Source: Royal Society of Chemistry journal article supplement (doi:10.1039/d1cc01779a), 2021-01-01
Supplement: d1cc01779a1.pdf [file d1cc01779a1.pdf]

## From crude industrial waste glycerol to biopropene *via* Ru-mediated hydrodeoxygenation in ionic liquids

Kwinten Janssens, Maxime Stalpaert, Mickaël Henrion and Dirk E. De Vos\*

*cMACS, KU Leuven, Celestijnenlaan 200F, 3001 Leuven, Belgium.*

*E-mail: dirk.devos@kuleuven.be*

### Summary on the glycerol to propene literature

**Table S1:** State of the art conversion of glycerol to propene.

| Catalyst                                                                                                                    | Conditions                             | Yield (%) | Glycerol Feed              | MeOH / salts                           |
|-----------------------------------------------------------------------------------------------------------------------------|----------------------------------------|-----------|----------------------------|----------------------------------------|
| 316 stainless steel & HOTf or<br>[Ru(H <sub>2</sub> O) <sub>3</sub> (4'-phenyl-terpyridine)](OTf) <sub>2</sub> <sup>1</sup> | 5.5 MPa H <sub>2</sub> , 250 °C, 24h   | 96        | 4 wt% in H <sub>2</sub> O  | <i>none / none</i>                     |
| Hydrogen iodide & AcOH <sup>2</sup>                                                                                         | 6.9 MPa H <sub>2</sub> , 210 °C, 5h    | 78        | 14 wt% in H <sub>2</sub> O | 1 wt% MeOH / 1 wt% salts               |
| Ir/ZrO <sub>2</sub> & ZSM-5-30 <sup>3</sup>                                                                                 | Continuous H <sub>2</sub> flow, 250 °C | 85        | 30 wt% in H <sub>2</sub> O | <i>none<sup>a</sup> / none</i>         |
| Fe-Mo/C <sup>4,5</sup>                                                                                                      | Continuous H <sub>2</sub> flow, 300 °C | 90        | 2 wt% in H <sub>2</sub> O  | <i>none / none</i>                     |
| WO <sub>3</sub> -Cu/Al <sub>2</sub> O <sub>3</sub> & SiO <sub>2</sub> -Al <sub>2</sub> O <sub>3</sub> <sup>6</sup>          | Continuous H <sub>2</sub> flow, 250 °C | 85        | 20 wt% in H <sub>2</sub> O | <i>none / none</i>                     |
| MoO <sub>3</sub> -Ni <sub>2</sub> P/Al <sub>2</sub> O <sub>3</sub> & ZSM-5-30 <sup>7</sup>                                  | Continuous H <sub>2</sub> flow, 250 °C | 72        | 59 wt% in H <sub>2</sub> O | 15 <sup>b</sup> wt% MeOH / <i>none</i> |
| Ru[CO] <sub>3</sub> Br <sub>2</sub> ( <i>in situ</i> ) & HBr/ <i>n</i> -Bu <sub>4</sub> PBr <sup>8</sup>                    | 4.0 MPa H <sub>2</sub> , 210°C, 1h     | 57        | 100 wt% (pure)             | <i>none / none</i>                     |

<sup>a</sup> Reaction was performed on crude glycerol (Glycerol/methanol/NaCl at 84:1:15 ratio) for the partial conversion to 1-propanol. However, there was no report on the conversion of crude glycerol to propene. <sup>b</sup> Simulated crude glycerol (Glycerol/methanol at 85:15 mass ratio), the reaction temperature was increased to 450 °C to promote propylene selectivity.

### Chemicals

Tetrabutylphosphonium bromide (Sigma-Aldrich, 98%), glycerol (Sigma-Aldrich 99%), *n*-dodecane (J&K, 95%), *n*-tetradecane (TCI, 99%), N<sub>2</sub> (Air Liquide, α1), H<sub>2</sub> (Air Liquide, N40), CO (Air Liquide, N37), HBr (Sigma-Aldrich, 48% in water), ruthenium(III) bromide hydrate (Alfa, Ru 25% min), trirutheniumdodecacarbonyl (Arcos, 99%), tricarbonyldichlororuthenium(II) dimer (Sigma Aldrich), formaldehyde (Sigma-Aldrich, ACS reagent, 37 wt.% in H<sub>2</sub>O, contains 10-15% methanol as stabilizer) *N,O*-bis(trimethylsilyl)trifluoroacetamide (Sigma-Aldrich, BSTFA + TCMS 99:1), sodium chloride (Fisher Scientific, +99%), sodium bromide (Sigma-Aldrich, 99%), potassium bromide (Acros, 99%), potassium chloride (VWR, 99%), hydrogen chloride (VWR, 37 wt.% in H<sub>2</sub>O), methanol (VWR, +99%), sulfuric acid (Merck, 98%), pyridine (Acros, 98%), 1,2,4-butanetriol (Alpha-Aesar, 96%), *N*-methyl-*N*-(trimethylsilyl)trifluoroacetamide (Alpha-Aesar, 97%, MSTFA), AgNO<sub>3</sub> (Sigma-Aldrich, 99%), NaSCN (Acros, 98%), (NH<sub>4</sub>)<sub>2</sub>Fe(II)(SO<sub>4</sub>)<sub>2</sub> (Sigma-Aldrich, 98%), benzene (Carl Roth 99%), chloroform (Fisher, 99%), hexane (Acros, 97%), Br<sub>2</sub> (Sigma-Aldrich, +99.5%) and crude glycerol (OleonNV, ex-biodiesel production). All chemicals were used as received unless mentioned otherwise.

### Catalytic reaction

First, the active catalyst is formed *in situ* during a pretreatment step using a CO source. Standard experiments start from RuBr<sub>3</sub>·xH<sub>2</sub>O (10 μmol, 4.0 mg), HBr (25 μmol, 2.8 μL), Bu<sub>4</sub>PBr (1.7 mmol, 577 mg) and formaldehyde (25 equivalents, 18.6 μL) or CO gas (certain pressure). All components are loaded in a glass liner inside a stainless steel pressure reactor and stirred for 30 minutes under 40 bar H<sub>2</sub> at 180 °C. After pretreatment the reactor is cooled on ice and the remaining H<sub>2</sub>/CO is released to the waste exhaust. Secondly, the actual catalytic hydrodeoxygenation of (crude) glycerol is performed. Glycerol + additives (0.5 mmol, additives on wt% basis), dodecane (1 mL, as an extracting apolar layer) and tetradecane (0.5 mmol, 0.13 mL, internal standard in dodecane layer) were additionally loaded into the reactor containing the pretreated catalyst. The reaction is performed typically for 1h under 40 bar H<sub>2</sub> at 220 °C, after which the reactor is again cooled, and a gaseous sample (for FT-IR gas phase analysis) is taken *via* a syringe. The yield of the apolar compounds is determined *via* GC analysis of the dodecane layer. Finally, an additional derivatisation step is performed using BSTFA (1mL), silylating the remaining unconverted polar intermediates in the polar IL layer for GC analysis.

## Product analysis

After reaction a spontaneous phase separation occurs between the IL and the dodecane layer.<sup>8</sup> A liquid aliquot of the dodecane layer was taken for GC analysis, performed on a Shimadzu GC-2013 instrument equipped with a DB-FFAP column as this allows for the separation of propene and propane and quantification of even highly volatile compounds.<sup>8</sup> GC analysis of the silylated polar intermediates (alcohols) was performed on a Shimadzu GC-2010 instrument equipped with a CP SIL-5 CB column.

However, at high conversions and propene selectivities, the amount of propane is very low compared to propene. Therefore, to maintain high accuracy on the exact propene/propane selectivity, in addition to quantitative GC analysis, we performed an independent analysis to determine the propene vs propane selectivity. Fourier Transformed Infrared (FT-IR) spectroscopy was performed on the gas in the headspace of the reactor, injecting a gas sample into a N<sub>2</sub> flow on a Gaset DX 4000 FT-IR gas analyzer. Spectra were processed using Calcmeter standard software (v. 12.161), and corresponded well with the liquid phase composition. The use of FT-IR relies on a difference in vibrations of the =C-H alkene stretch (above 3000 cm<sup>-1</sup>) compared to the -C-H alkane stretch (2800-3000 cm<sup>-1</sup>). The Calcmeter software allows for the accurate calculation of the propene vs propene+propane ratio, thus indicating the selectivity of the system even at very low concentrations (below 1% of the formed C<sub>3</sub>-compounds is present in the gaseous phase).

Apart from propene/propane and CO/CH<sub>4</sub>, originating from the catalyst pretreatment and HDO of formaldehyde and methanol additives, no additional gaseous compounds were detected, indicating that no fragmentation of C<sub>3</sub> to C<sub>2</sub> products occurs (also confirmed with GC-MS). In the first liquid extraction, apart from acetone, all side products are below 2% yield, unless mentioned otherwise. The other detected compounds include mono-bromopropanes, propanal, and C<sub>6</sub> compounds (hexanones and hexenes) (Scheme 1, 5). In the extraction after a derivatisation reaction, increased amounts of polar intermediates were observed in case of slow dehydration. These products were categorized as hydroxy compounds (Scheme 1, 4) comprising glycerol, 1,2-propanediol, 2-propanol and 1-propanol. Hydroxyacetone and 1,3-propanediol were occasionally detected, but always in amounts below 1%.

## Crude glycerol (real vs. simulated)

Simulated crude glycerol blends were all made weighing the corresponding components in a glass vial and applying intensive stirring on a vortex mixer. All samples are blended on weight percentage (wt%) basis. For example, the simulated blend used in entries 9, 12, 15 and 18 contains 80 wt% of glycerol, 10 wt% of water, 5 wt% of NaCl and 5 wt% MeOH. This represents an extreme scenario in which no purification of the waste glycerol is performed, with rather high residues of saponification and acidification reagents. The real ex-biodiesel crude glycerol was kindly provided by Oleon<sup>NV</sup> (±80 wt% glycerol).

## Crude glycerol analysis

Additional experiments were performed to analyze the composition of the industrial glycerol. The industrial sample was simply filtered over a 0.45 µm filter (Merck, Millipore Millex HP) to remove solid particles, obtaining a homogeneous, amber colored liquid. The glycerol content was determined according to a literature procedure.<sup>9</sup> Crude glycerol was weighed (100 mg), acidified by 100 µL 1:1 HCl (v/v) and dissolved in pyridine (10 mL). Then, a 100 µL aliquot and 100 µL of an 1,2,4-butanetriol standard solution (8.7 mg/mL) were derivatized using *N*-methyl-*N*-(trimethylsilyl)trifluoroacetamide (MSTFA, 100 µL) for 15 min at 38°C in a GC vial. After reaction the sample was cooled down and measured on a Shimadzu GC-2010 instrument equipped with an CP SIL-5 CB column. A calibration curve based on pure glycerol was used, indicating a 78±2 wt% of glycerol content. Karl Fisher titration was performed (870 KF Titrino plus, Metrohm) indicating 20±1 wt% water. Chloride content was determined *via* Volhard titration. Crude glycerol (500 mg) was diluted in water (5 mL) and stirred with excess AgNO<sub>3</sub> (1 mmol, 169.9 mg) forming AgCl in suspension. Then, the remaining Ag<sup>+</sup> ions were back-titrated with NaSCN (0.1M) using (NH<sub>4</sub>)<sub>2</sub>Fe(II)(SO<sub>4</sub>)<sub>2</sub> as an indicator. At the equivalence point the solution turned from light yellow to dark red, indicating a total chloride content of 2 wt%.

## Synthesis of [RuBr<sub>2</sub>(CO)<sub>3</sub>]<sub>2</sub>

The ruthenium bromide carbonyl complex was synthesized according to a literature procedure.<sup>8,10</sup> Ru<sub>3</sub>(CO)<sub>12</sub> (0.064 g, 0.10 mmol) was dissolved in dry benzene resulting in an orange solution. Excess Br<sub>2</sub> was added and the solution was stirred vigorously for 3 hours. The solvent and unreacted Br<sub>2</sub> were removed under reduced pressure. The crude product was purified by recrystallization in chloroform/hexane resulting in a yellow solid. The identity of the [RuBr<sub>2</sub>(CO)<sub>3</sub>]<sub>2</sub> complex was confirmed with FT-IR spectroscopy and Electrospray Ionization Mass Spectrometry (ESI-MS). The FTIR sample was analyzed in a Bruker IFS 66v/S FTIR spectrometer under vacuum. The data were analyzed using OriginPro. The ESI-MS was conducted in positive ion mode with a Thermo Finnigan LCQ Advantage mass spectrometer. ν(CO): (KBr) 2138 cm<sup>-1</sup> (s), 2078 (s) cm<sup>-1</sup>, ESI-MS (MH<sup>+</sup> in CH<sub>3</sub>CN): 387.75; found, 388.0.

## Catalyst recycling experiments

The reaction was performed as described under optimal conditions (Table 2, entry 21). After reaction, the gaseous phase and dodecane layer were removed and analyzed. Derivatisation of polar compounds remaining in the ionic liquid layer was not carried out in between cycles, as unreacted BSTFA and unwanted side products could remain in the IL and hinder the catalytic

performance. The IL layer was dried overnight at 110°C under reduced pressure (30 mbar) after which HBr was added and the catalyst was pretreated as usual (0.1 MPa CO, 4.0 MPa H<sub>2</sub>, 30 min, 180°C). After pretreatment the catalyst was loaded with fresh, crude glycerol and extraction solvent. After the 8<sup>th</sup> cycle the remaining polar compounds are quantified *via* a derivatisation step using BSTFA, as described under product analysis.

### Characterization and stability of the (recycled) catalyst

Solid phase Fourier transform infrared (FT-IR) spectroscopy was performed on fresh and recycled Ru-catalyst, entrapped in the solidified ionic liquid (after 8<sup>th</sup> cycle). Both catalysts were pretreated as described above (0.1 MPa CO, 4.0 MPa H<sub>2</sub>, 30 min, 180°C). The samples were analyzed in a Bruker Vortex v70 FT-IR spectrometer. The data were analyzed using OPUS software.

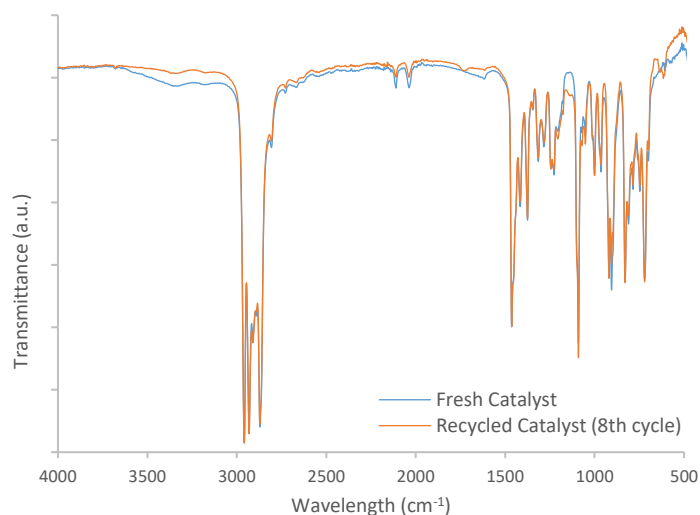

**Fig. S1** Fourier transformed infrared spectroscopy of fresh and recycled Ru-catalyst

To confirm the catalyst stability in combination with preservation of high selectivity, we exposed both fresh and recycled pretreated catalyst (after 8<sup>th</sup> cycle) to 0.1 MPa of pure propylene gas under relevant reaction conditions (0.01 mmol Ru<sub>cat</sub>, 1.7 mmol Bu<sub>4</sub>PBr, 25 μmol HBr, 1 mL dodecane, 0.5 mmol tetradecane (IS), 4.0 MPa H<sub>2</sub>, 1h, 220°C). After reaction only the propene vs propane ratio was analyzed as described under Product Analysis. Both reactions showed very low propane formation (>90% of the C<sub>3</sub> fraction is still propene), showing that overhydrogenation of the desired olefin is avoided.

### References

- 1 D. Di Mondo, D. Ashok, F. Waldie, N. Schrier, M. Morrison and M. Schlaf, *ACS Catal.*, 2011, **1**, 355–364.
- 2 Deshpande, R. Davis, P. Pandey, V. Kore, N., US Pat., WO20130900, 2013.
- 3 L. Yu, J. Yuan, Q. Zhang, Y. M. Liu, H. Y. He, K. N. Fan and Y. Cao, *ChemSusChem*, 2014, **7**, 743–747.
- 4 V. Zacharopoulou, E. S. Vasiliadou and A. A. Lemonidou, *Green Chem.*, 2015, **17**, 903–912.
- 5 C. J. A. Mota, V. L. C. Gonçalves, J. E. Mellizo, A. M. Rocco, J. C. Fadigas and R. Gambetta, *J. Mol. Catal. A Chem.*, 2016, **422**, 158–164.
- 6 D. Sun, Y. Yamada and S. Sato, *Appl. Catal. B Environ.*, 2015, **174–175**, 13–20.
- 7 Z. Wu, H. Yan, S. Ge, J. Gao, T. Dou, Y. Li, A. C. K. Yip and M. Zhang, *Catal. Commun.*, 2017, **92**, 80–85.
- 8 M. Stalpaert, K. Janssens, C. Marquez, M. Henrion, A. L. Bugaev, A. V. Soldatov and D. De Vos, *ACS Catal.*, 2020, **10**, 9401–9409.
- 9 S. Hu, X. Luo, C. Wan and Y. Li, *J. Agric. Food Chem.*, 2012, **60**, 5915–5921.
- 10 B. F. G. Johnson, R. D. Johnston and J. Lewis, *J. Chem. Soc. A Inorganic, Phys. Theor.*, 1969, 792.
